# Supplementary material for: ELOVL2-AS1 inhibits migration of triple negative breast cancer
Source: PeerJ journal article supplement (doi:10.7717/peerj.13264), 2022-04-14
Supplement: Figure_S1.pdf [file Figure_S1.pdf]

ELOVL2-AS1 level + high + low

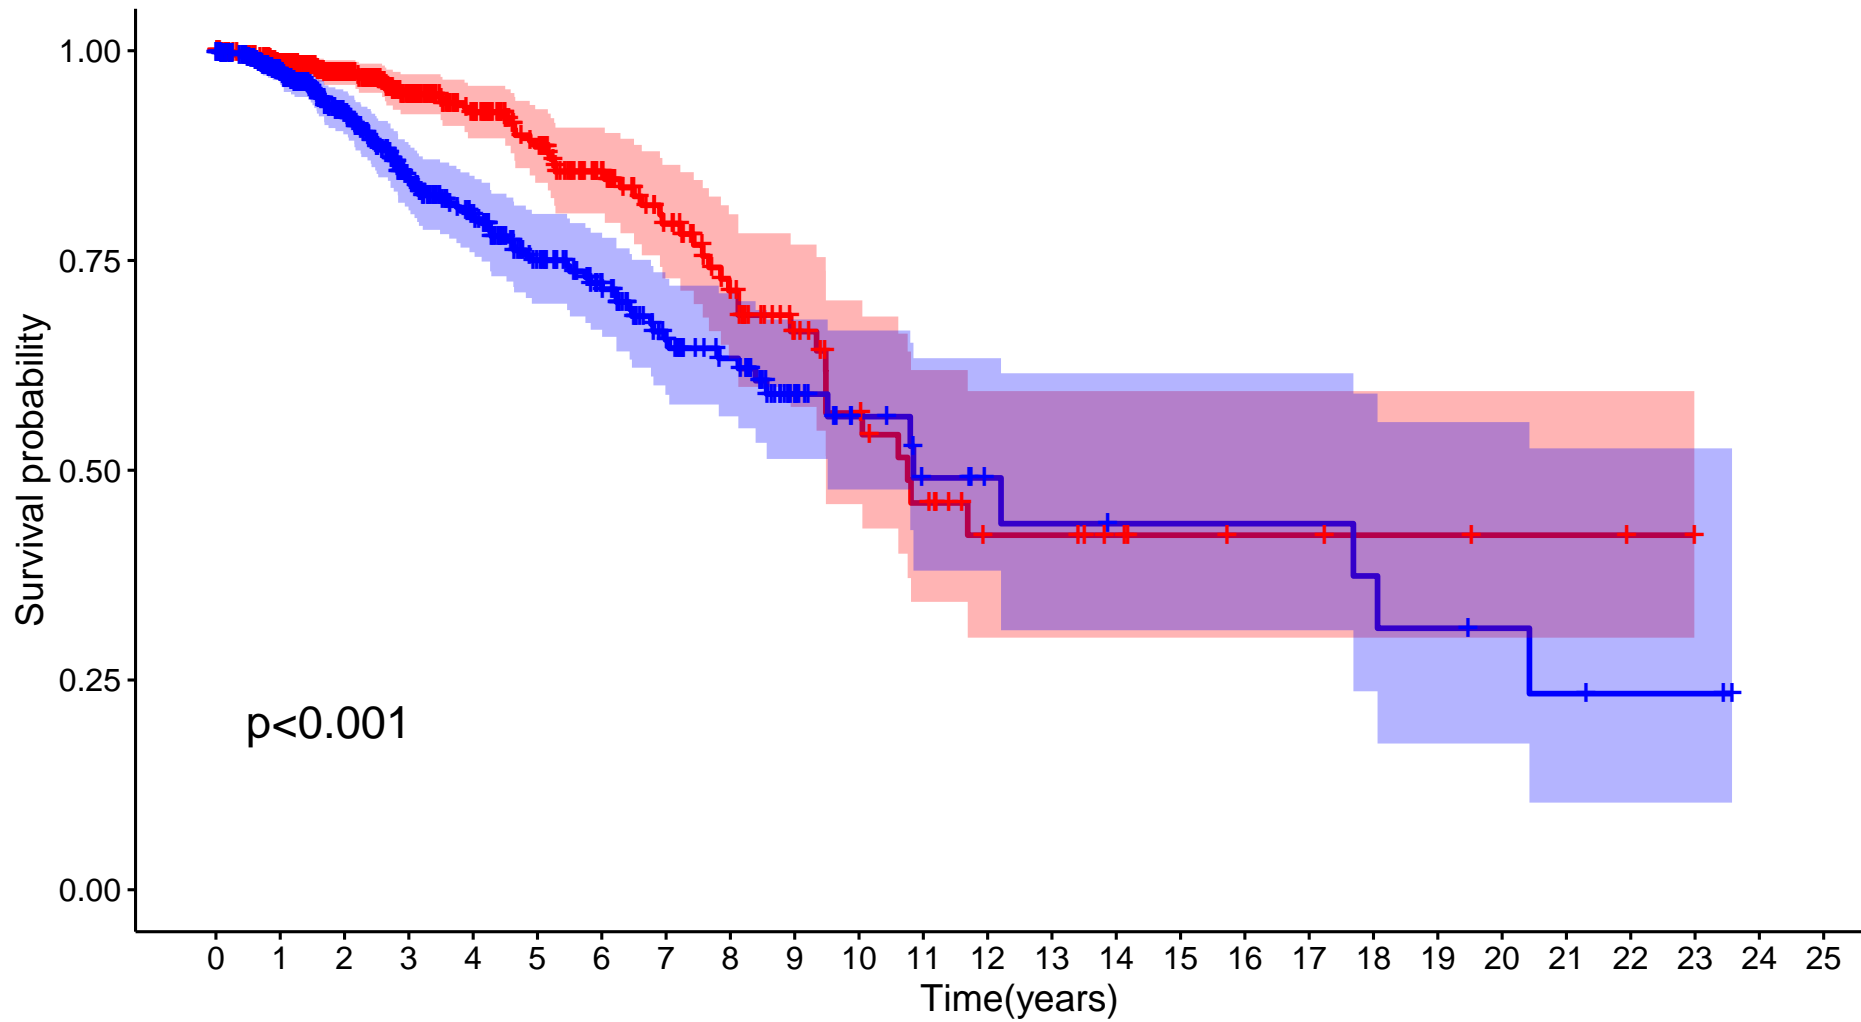

ELOVL2-AS1 level

| Time (years) | 0   | 1   | 2   | 3   | 4   | 5   | 6  | 7  | 8  | 9  | 10 | 11 | 12 | 13 | 14 | 15 | 16 | 17 | 18 | 19 | 20 | 21 | 22 | 23 | 24 | 25 |
|--------------|-----|-----|-----|-----|-----|-----|----|----|----|----|----|----|----|----|----|----|----|----|----|----|----|----|----|----|----|----|
| high         | 541 | 475 | 307 | 223 | 164 | 127 | 98 | 70 | 51 | 31 | 23 | 17 | 10 | 10 | 7  | 5  | 4  | 4  | 3  | 3  | 2  | 2  | 1  | 0  | 0  | 0  |
| low          | 541 | 447 | 294 | 212 | 166 | 124 | 99 | 67 | 52 | 28 | 17 | 12 | 9  | 8  | 7  | 7  | 7  | 7  | 6  | 5  | 4  | 3  | 2  | 2  | 0  | 0  |

Time(years)
