# Supplementary material for: ELOVL2-AS1 inhibits migration of triple negative breast cancer
Source: PeerJ journal article supplement (doi:10.7717/peerj.13264), 2022-04-14

A

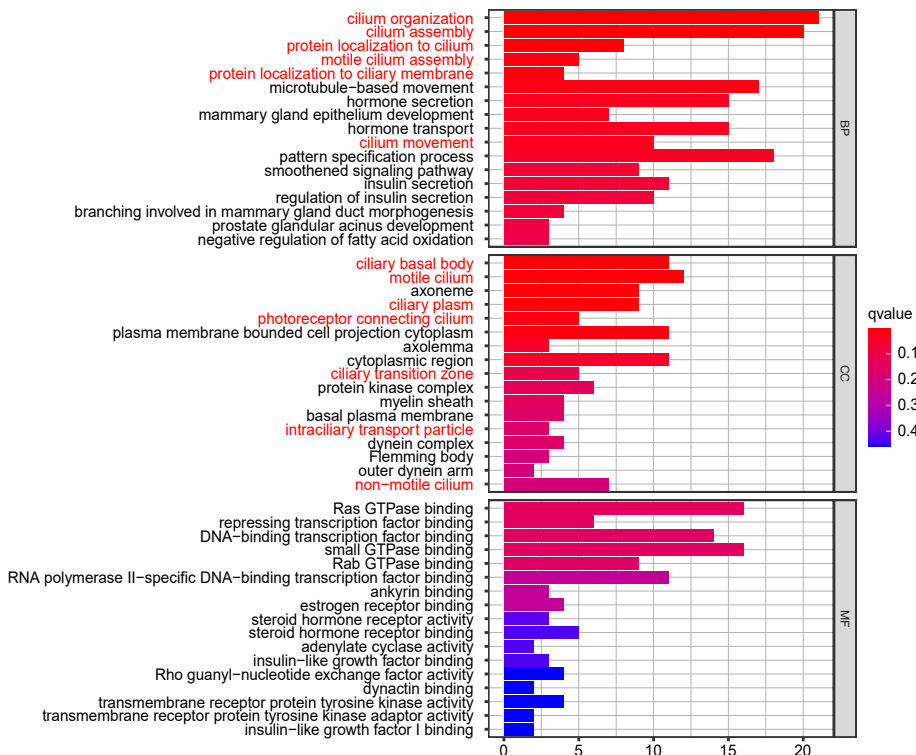

B

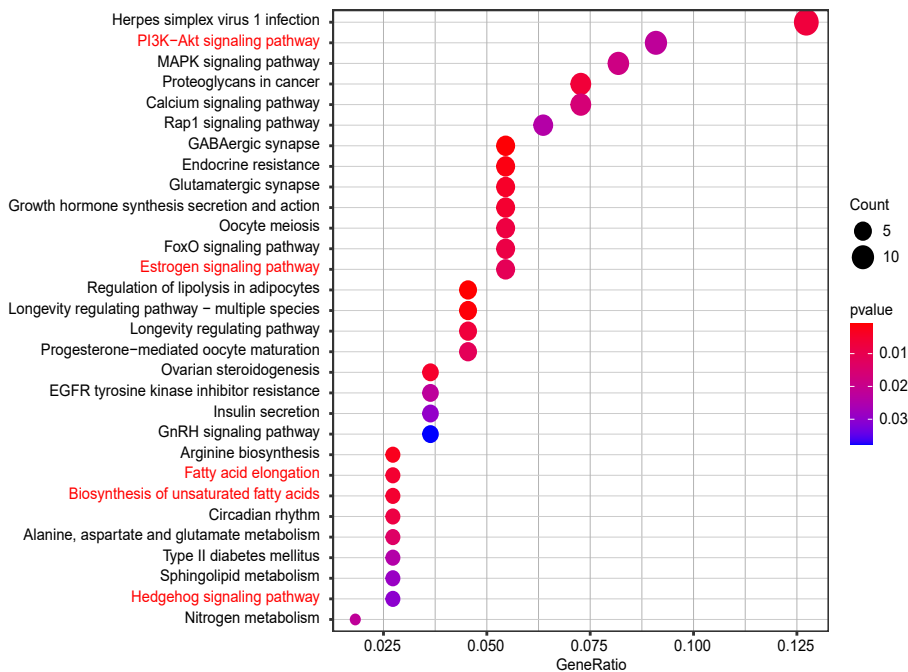

Supplement: Figure_S2.pdf [file Figure_S2.pdf]
