# Supplementary material for: ELOVL2-AS1 inhibits migration of triple negative breast cancer
Source: PeerJ journal article supplement (doi:10.7717/peerj.13264), 2022-04-14

**Enrichment plot:****GO\_PHOTORECEPTOR\_CONNECTING\_CILIUM**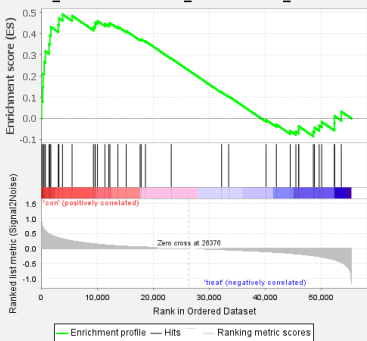**Enrichment plot: GO\_PHOTORECEPTOR\_CELL\_CILIUM**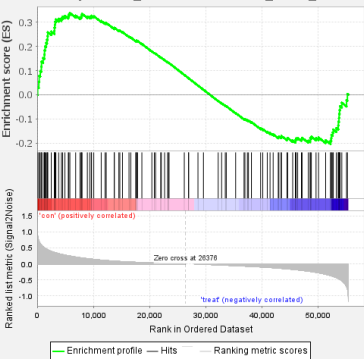**Enrichment plot:****REACTOME\_VXPX\_CARGO\_TARGETING\_TO\_CILIUM**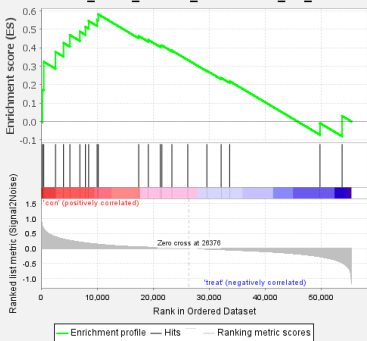**Enrichment plot:****GO\_REGULATION\_OF\_CILIUM\_ASSEMBLY**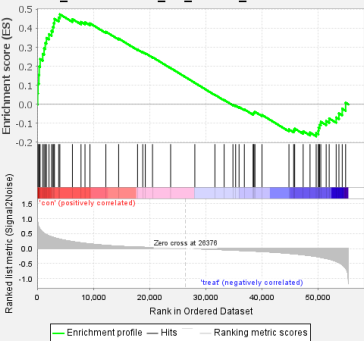**Enrichment plot: REACTOME\_CILIUM\_ASSEMBLY**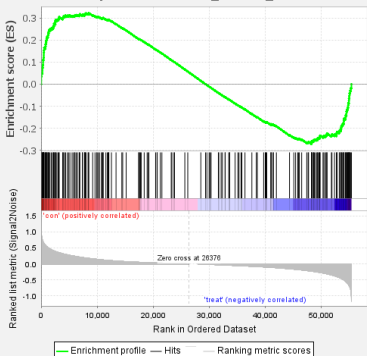**Enrichment plot:****REACTOME\_BBSOME\_MEDIATED\_CARGO\_TARGETING\_TO\_CILIUM**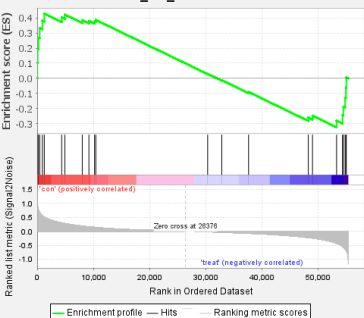**Enrichment plot: GO\_NON\_MOTILE\_CILIUM**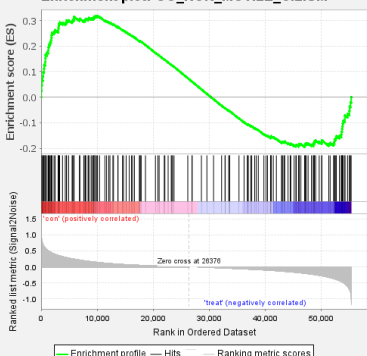**Enrichment plot: GO\_9PLUS0\_NON\_MOTILE\_CILIUM**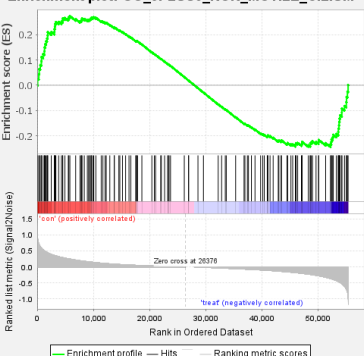

Supplement: Figure_S3.pdf [file Figure_S3.pdf]
